# Supplementary material for: Taurine Treatment Modulates Circadian Rhythms in Mice Fed A High Fat Diet
Source: PubMed Central journal article supplement (PMC5114685; doi:10.1038/srep36801), 2016-11-18
Supplement: srep36801-s1.pdf [file srep36801-s1.pdf]

**TAURINE TREATMENT MODULATES CIRCADIAN RHYTHMS IN MICE FED A  
HIGH FAT DIET**

Ana Lucia C. Figueroa<sup>1</sup>, Hugo Figueiredo<sup>1</sup>, Sandra A. Rebuffat<sup>1,2</sup>, Elaine Vieira<sup>\*2,3</sup> Ramon  
Gomis<sup>\*1,2,4</sup>

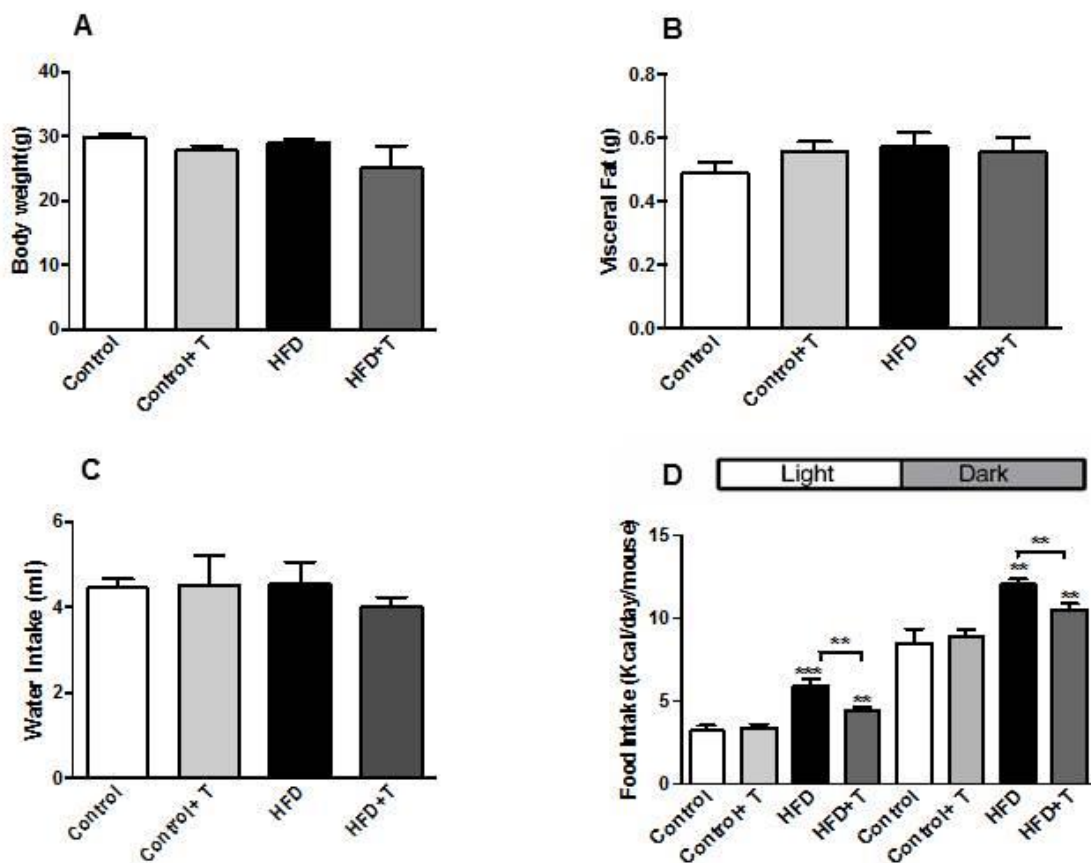

**Supplementary Figure 1. Effects of taurine treatment on body weight, visceral fat, water intake and food intake after 1 week of treatment . (A) Body weight, (B) visceral fat, (C) water intake and (D) food intake during the light and dark cycles. (n=5-7 mice per group). Data are expressed as mean  $\pm$  SEM. \*\*  $p < 0.01$  \*\*\*  $p < 0.001$**

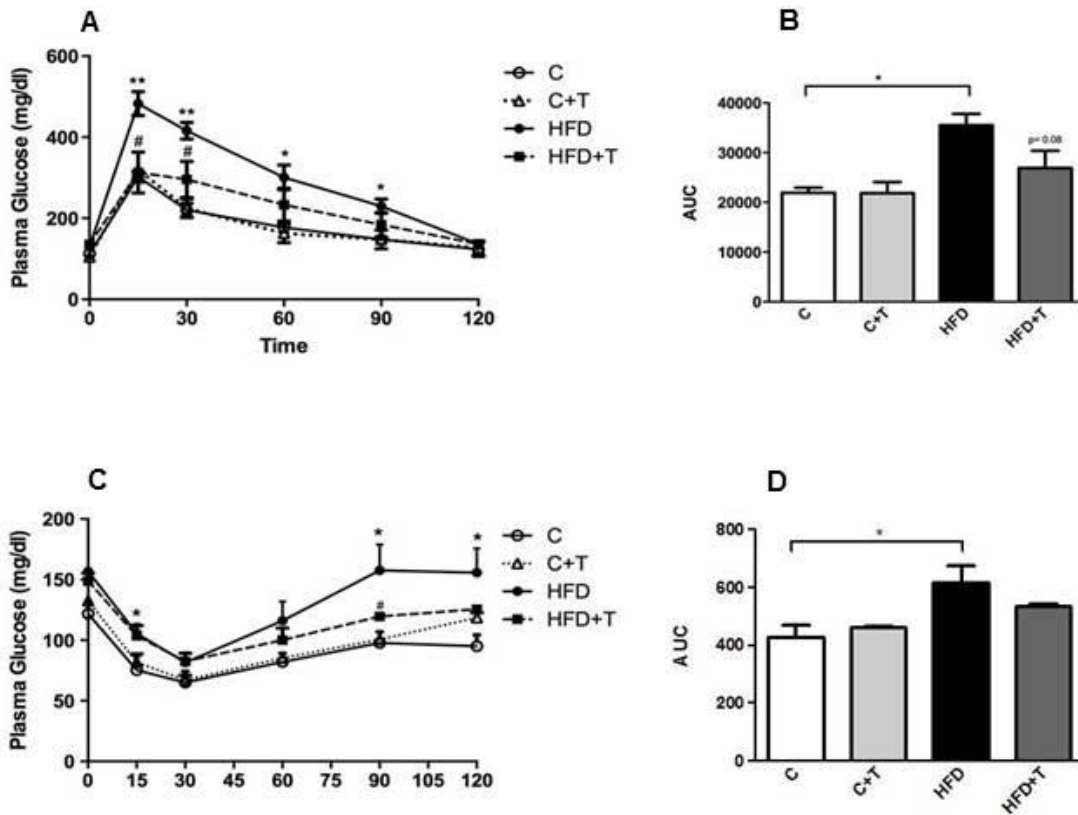

**Supplementary Figure 2. Effects of taurine treatment on glucose tolerance and insulin sensitivity after 1 week of treatment.** Glucose tolerance test (A). Differences between C vs HFD (\*  $P < 0.05$ , \*\*  $P < 0.01$ ); HFD vs HFD+ T (#  $P < 0.05$ ). (n=5-7 mice per group) (B) Area under the curve (AUC). (C) Insulin tolerance test. Differences between C vs HFD (\*  $P < 0.05$ ); HFD vs HFD+ T (#  $P < 0.05$ ). (n=5-7 mice per group) (D) Area under the curve (AUC). Data are expressed as mean  $\pm$  SEM.

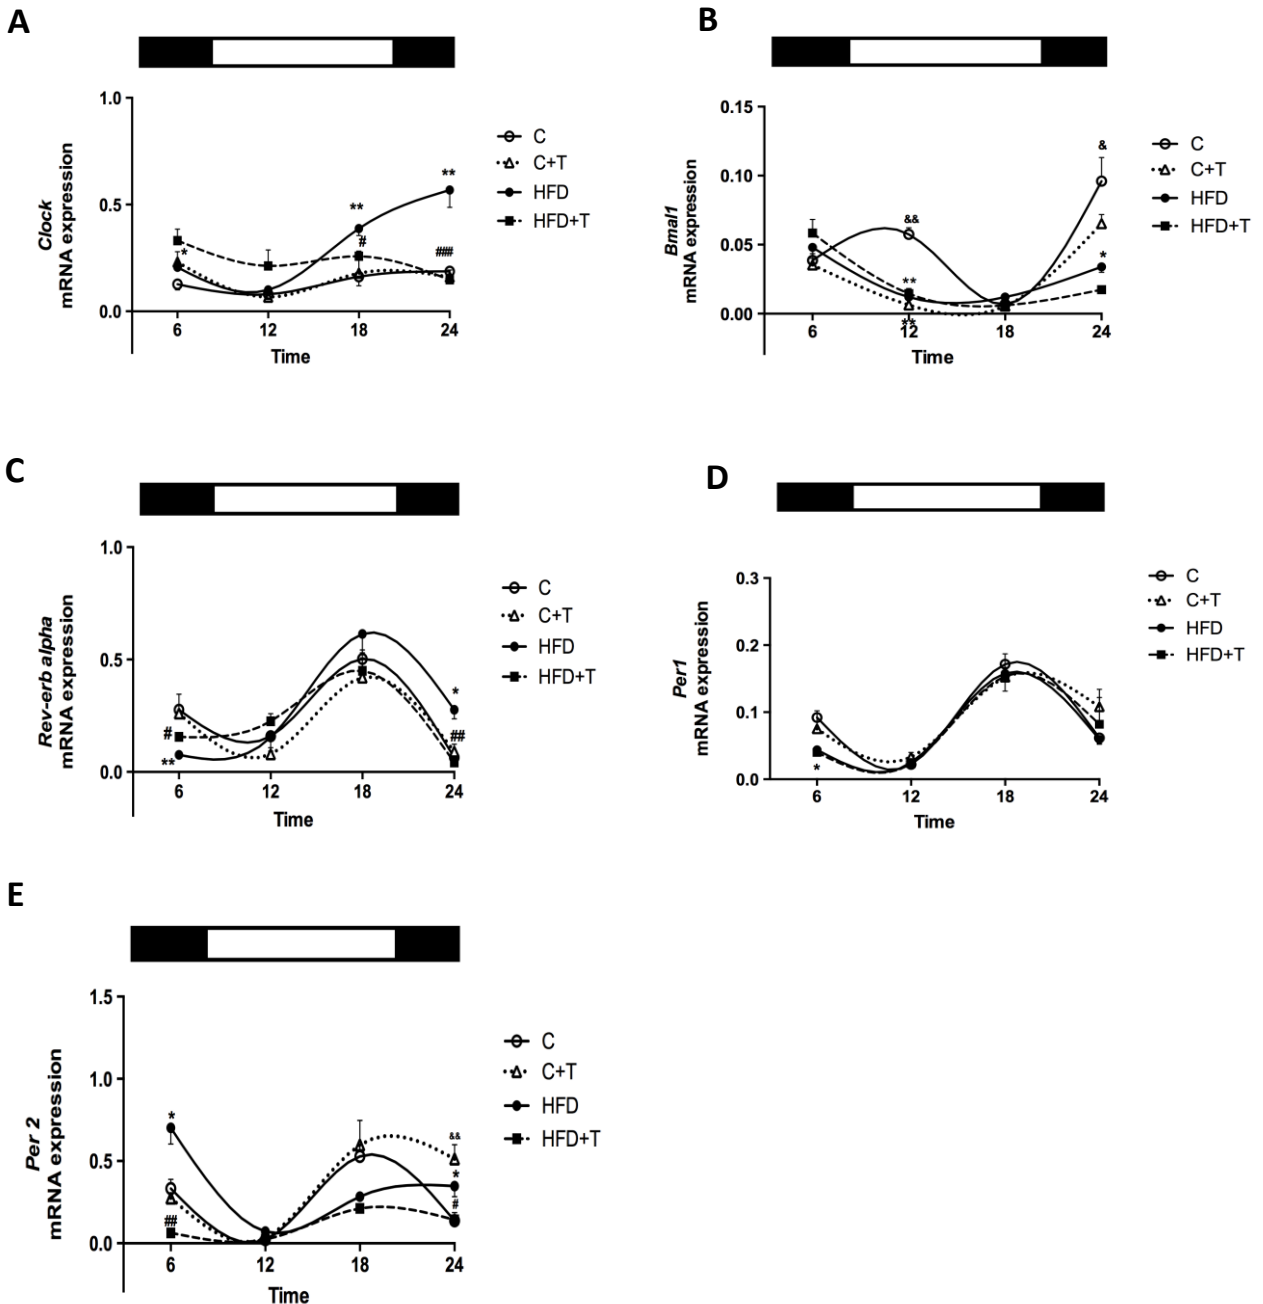

### Supplementary Figure 3. Clock genes expression in adipose tissue during 24h.

Expression of clock genes in visceral adipose tissue at different times of day (6:00h, 12:00h, 18:00h and 24:00h) after 10 weeks of taurine treatment. (n=4-5). (A) *Clock* gene expression in adipose tissue (C), (C+T), (HFD) and (HFD+T). (B) *Rev-erb alpha* gene expression in adipose tissue. (C) *Bmal1* gene expression in islets. (D) *Per1* gene expression in adipose tissue. (E) *Per2* gene expression in adipose tissue. Data are expressed as mean  $\pm$  SEM. Differences between C vs C+T (&P<0.05, && P<0.01), C vs HFD (\*P<0.05, \*\*P<0.01) and HFD vs HFD+T (#P<0.05, ##P<0.01, ###P<0.001) (n=6-7 mice per group). The black bars refer on the top of the figures to the dark cycle and the white bars to the light cycle.
